# Supplementary material for: Composition and Activity of Microbial Communities along the Redox Gradient of an Alkaline, Hypersaline, Lake
Source: Front Microbiol. 2018 Jan 31;9:14. doi: 10.3389/fmicb.2018.00014 (PMC5797777; doi:10.3389/fmicb.2018.00014)
Supplement: Supplementary file 2 [file Table2.XLSX]

## Sheet: Sheet1
Table S2. 16S rRNA amplicon sequencing OTU table with SILVA taxonomy. Purple highlighted OTUs are present at all depths and >1% relative abundance, yellow highlighted OTUs are >1% relative abundance at one or more depths and blue highlighted OTUs are present at all depths but at <1% relative abundance.
OTU ID	QIIME-Assigned OTU name	SILVA Taxonomy
1	AAQF01000123	Bacteria; Proteobacteria; Deltaproteobacteria; Desulfobacterales; Desulfobulbaceae; Desulfurivibrio
2	AB294306	Bacteria; Firmicutes; Clostridia; Clostridiales; Clostridiaceae; Anoxynatronum
3	AF448193	Bacteria; Actinobacteria; Nitriliruptoria; Nitriliruptorales; Nitriliruptoraceae; Nitriliruptor
4	AF449768	Bacteria; Bacteroidetes; Bacteroidia; Bacteroidales; unclassified Bacteroidales; ML635J-40 aquatic group
5	AF449769	Bacteria; Bacteroidetes; Bacteroidia; Bacteroidales; unclassified Bacteroidales; ML635J-40 aquatic group
6	AF449778	Bacteria; Bacteroidetes; Cytophagia; unclassified Cytophagia; Order III Incertae Sedis; ML310M-34
7	AF449781	Bacteria; Bacteroidetes; unclassified Bacteroidetes; unclassified Bacteroidetes; unclassified Bacteroidetes; ML602M-17
8	AF449782	Bacteria; Bacteroidetes; Cytophagia; unclassified Cytophagia; Order III Incertae Sedis; ML602J-37
9	AF452599	Bacteria; Bacteroidetes; Sphingobacteriia; Sphingobacteriales; Saprospiraceae; uncultured Saprospiraceae
10	AF452605	Bacteria; Proteobacteria; Gammaproteobacteria; Chromatiales; Ectothiorhodospiraceae; Thioalkalivibrio
11	AF452606	Bacteria; Proteobacteria; Gammaproteobacteria; unclassified gammaproteobacteria; unclassified gammaproteobacteria; Marinicella
12	AF452608	Bacteria; Proteobacteria; Gammaproteobacteria; Chromatiales; Ectothiorhodospiraceae; Spiribacter
13	AF453543	Bacteria; Proteobacteria; Gammaproteobacteria; Oceanospirillales; unclassified Oceanospillales; ML617.5J-3
14	AF454298	Bacteria; Firmicutes; Clostridia; Clostridiales; Syntrophomonadaceae; uncultured Syntrophomonadaceae
15	AF454300	Bacteria; Firmicutes; Bacilli; Bacillales; Bacillaceae; Bacillus
16	AF454301	Bacteria; Tenericutes; Mollicutes; unclassified Mollicutes; unclassified Mollicutes; NB1-n
17	AF454308	Bacteria; Spirochaetes; Spirochaetes; Spirochaetales; Spirochaetaceae; Spirochaeta
18	AF454309	Bacteria; Lentisphaerae; Lentisphaeria; unclassified Lentisphaeria; unclassified Lentisphaeria; ML1228J-2
19	AF454310	Bacteria; Lentisphaerae; Lentisphaeria; unclassified Lentisphaeria; unclassified Lentisphaeria; ML1228J-2
20	AF458284	Bacteria; Proteobacteria; Deltaproteobacteria; Desulfobacterales; Desulfobulbaceae; Desulfurivibrio
21	AF507855	Bacteria; Spirochaetes; Spirochaetes; Spirochaetales; Spirochaetaceae; Spirochaeta
22	AF507857	Bacteria; Bacteroidetes; Bacteroidia; Bacteroidales; unclassified Bacteroidales; ML635J-40 aquatic group
23	AF507860	Bacteria; Bacteroidetes; Bacteroidia; Bacteroidales; unclassified Bacteroidales; ML635J-40 aquatic group
24	AF507862	Bacteria; Bacteroidetes; Bacteroidia; Bacteroidales; unclassified Bacteroidales; ML635J-40 aquatic group
25	AF507866	Bacteria; Bacteroidetes; Sphingobacteriia; Sphingobacteriales; Chitinophagaceae; uncultured Chitinophagaceae
26	AF507867	Bacteria; Bacteroidetes; Flavobacteria; Flavobacteriales; Cryomorphaceae; Brumimicrobium
27	AF507869	Bacteria; Bacteroidetes; Bacteroidia; Bacteroidales; Marinilabiaceae; uncultured Marinilabiaceae
28	AF507875	Bacteria; Firmicutes; Clostridia; Clostridiales; Syntrophomonadaceae; uncultured Syntrophomonadaceae
29	AF507877	Bacteria; Firmicutes; Clostridia; Clostridiales; Syntrophomonadaceae; uncultured Syntrophomonadaceae
30	AF507890	Bacteria; Firmicutes; Clostridia; Clostridiales; unclassified Clostridiales; OPB54
31	AJ271453	Bacteria; Firmicutes; Clostridia; Clostridiales; Clostridiaceae; Anoxynatronum
32	AJ532694	Bacteria; Proteobacteria; Gammaproteobacteria; Thiotrichales; Piscirickettsiaceae; Thiomicrospira
33	DQ015831	Bacteria; Bacteroidetes; Cytophagia; unclassified Cytophagia; Order III Incertae Sedis; ML602J-37
34	DQ124682	Bacteria; Firmicutes; Clostridia; Clostridiales; Syntrophomonadaceae; Candidatus Contubernalis
35	DQ206406	Bacteria; Planctomycetes; Phycisphaerae; unclassified phycisphaerae; unclassified phycisphaerae; ML-A-10
36	DQ206410	Bacteria; Firmicutes; Clostridia; Clostridiales; Syntrophomonadaceae; Dethiobacter
37	DQ206423	Bacteria; Firmicutes; Clostridia; Clostridiales; Ruminococcaceae; Fastidiosipila
38	DQ432391	Bacteria; Proteobacteria; Gammaproteobacteria; unclassified gammaproteobacteria; unclassified gammaproteobacteria; HOC36
39	DQ432395	Bacteria; Proteobacteria; Alphaproteobacteria; Rhodobacterales; Rhodobacteraceae; uncultured Rhodobacteraceae
40	DQ432396	Bacteria; Actinobacteria; Nitriliruptoria; Nitriliruptorales; Nitriliruptoraceae; Nitriliruptor
41	DQ900622	Bacteria; Proteobacteria; Gammaproteobacteria; Thiotrichales; Piscirickettsiaceae; Thiomicrospira
42	DQ988278	Bacteria; Firmicutes; Clostridia; Clostridiales; unclassified Clostridiales; P. palm C-A 51
43	EF422413	Bacteria; Proteobacteria; Deltaproteobacteria; Desulfobacterales; Desulfobulbaceae; Desulfurivibrio
44	EF632658	Bacteria; Proteobacteria; Gammaproteobacteria; Alteromonadales; Alteromonadaceae; Haliea
45	EU180983	Bacteria; Proteobacteria; Gammaproteobacteria; Oceanospirillales; Oceanospirillaceae; Nitrincola
46	EU245382	Bacteria; Firmicutes; Clostridia; Clostridiales; Family XI; unclassified Clostridiales
47	EU283512	Bacteria; Bacteroidetes; Bacteroidia; Bacteroidales; unclassified Bacteroidales; ML635J-40 aquatic group
48	EU375807	Bacteria; Proteobacteria; Gammaproteobacteria; Oceanospirillales; Oceanospirillaceae; Marinospirillum
49	EU703291	Bacteria; Bacteroidetes; Flavobacteria; Flavobacteriales; Cryomorphaceae; Fluviicola
50	EU709859	Bacteria; Proteobacteria; Gammaproteobacteria; Chromatiales; Ectothiorhodospiraceae; Thioalkalivibrio
51	EU843077	Bacteria; Firmicutes; Clostridia; Clostridiales; Ruminococcaceae; uncultured Ruminococcaceae
52	EU911993	Bacteria; Bacteroidetes; Cytophagia; unclassified Cytophagia; Order III Incertae Sedis; ML602J-37
53	FJ152889	Bacteria; Proteobacteria; Gammaproteobacteria; unclassified Gammaproteobacteria; unclassified Gammaproteobacteria; HOC36
54	FJ152901	Bacteria; Bacteroidetes; Cytophagia; unclassified Cytophagia; Order III Incertae Sedis; ML602J-37
55	FJ152914	Bacteria; Bacteroidetes; Cytophagia; unclassified Cytophagia; Order III Incertae Sedis; ML602J-37
56	FJ152933	Bacteria; Actinobacteria; Nitriliruptoria; Nitriliruptorales; Nitriliruptoraceae; Nitriliruptor
57	FJ152979	Bacteria; Bacteroidetes; Flavobacteria; Flavobacteriales; Cryomorphaceae; Cryomorpha
58	FJ153016	Bacteria; Proteobacteria; Gammaproteobacteria; unclassified gammaproteobacteria; unclassified gammaproteobacteria; Methylonatrum
59	FJ485151	Bacteria; Bacteroidetes; Cytophagia; unclassified Cytophagia; Order III Incertae Sedis; CK06-06-Mud-MAS4B-21
60	FJ788525	Bacteria; Firmicutes; Clostridia; Clostridiales; Peptococcaceae; Desulfitispora
61	FJ973586	Bacteria; Proteobacteria; Betaproteobacteria; Burkholderiales; Alcaligenaceae; GKS98 freshwater group
62	FJ999568	Bacteria; Proteobacteria; Gammaproteobacteria; Alteromonadales; Alteromonadaceae; Haliea
63	FM957461	Bacteria; Proteobacteria; Gammaproteobacteria; Vibrionales; Vibrionaceae; Vibrio
64	GQ135733	Bacteria; Planctomycetes; Phycisphaerae; unclassified phycisphaerae; unclassified phycisphaerae; ML-A-10
65	GQ138312	Bacteria; Planctomycetes; Phycisphaerae; unclassified phycisphaerae; unclassified phycisphaerae; KCLunmb-38-53
66	GQ347369	Bacteria; Proteobacteria; Gammaproteobacteria; Legionellales; Legionellaceae; uncultured Legionellaceae
67	GQ377778	Bacteria; Cyanobacteria; unclassified Cyanobacteria; Cyanobacteria Subsection I; Cyanobacteria Family I; Synechococcus
68	GQ848216	Bacteria; Firmicutes; Clostridia; Clostridiales; Syntrophomonadaceae; uncultured Syntrophomonadaceae
69	GU083688	Bacteria; Proteobacteria; unclassified Proteobacteria; unclassified Proteobacteria; unclassified Proteobacteria; ARKICE-90
70	GU083693	Bacteria; Bacteroidetes; unclassified Bacteroidetes; unclassified Bacteroidetes; unclassified Bacteroidetes; BD2-2
71	GU235586	Bacteria; Proteobacteria; Gammaproteobacteria; Thiotrichales; Francisellaceae; Francisella
72	GU289732	Bacteria; Proteobacteria; Deltaproteobacteria; Desulfobacterales; Desulfobacteraceae; Desulfosalsimonas
73	GU735094	Bacteria; Proteobacteria; Gammaproteobacteria; Chromatiales; Ectothiorhodospiraceae; Thioalkalivibrio
74	HE574924	Bacteria; Proteobacteria; Alphaproteobacteria; Rhodobacterales; Rhodobacteraceae; uncultured Rhodobacteraceae
75	HE611101	Bacteria; Fusobacteria; Fusobacteriia; Fusobacteriales; Leptotrichiaceae; uncultured Leptotrichiaceae
76	HM038237	Bacteria; Proteobacteria; Betaproteobacteria; Burkholderiales; Alcaligenaceae; GKS98 freshwater group
77	HM127957	Bacteria; Proteobacteria; Alphaproteobacteria; Rhizobiales; Bradyrhizobiaceae; Salinarimonas
78	HM128005	Bacteria; Planctomycetes; Planctomycetacia; Planctomycetales; Planctomycetaceae; Rhodopirellula
79	HM128153	Bacteria; Bacteroidetes; Cytophagia; unclassified Cytophagia; Order III Incertae Sedis; ML602J-37
80	HM128188	Bacteria; Proteobacteria; Deltaproteobacteria; Desulfovibrionales; Desulfonatronaceae; Desulfonatronum
81	HM128337	Bacteria; Proteobacteria; Alphaproteobacteria; Rhodobacterales; Rhodobacteraceae; unclassified Rhodobacteraceae
82	HM128341	Bacteria; Firmicutes; Clostridia; Clostridiales; Peptostreptococcaceae; uncultured Peptostreptococcaceae
83	HM129833	Bacteria; Actinobacteria; Actinobacteria; Micrococcales; Microbacteriaceae; unclassified Microbacteriaceae
84	HM130024	Bacteria; Actinobacteria; Acidimicrobiia; Acidimicrobiales; unclassified Acidimicrobiales; unclassified Acidimicrobiales
85	HM468058	Bacteria; Candidate division BRC1; unclassified Candidate division BRC1; unclassified Candidate division BRC1; unclassified Candidate division BRC1; unclassified Candidate division BRC1
86	HQ166789	Bacteria; Proteobacteria; Alphaproteobacteria; Rhodobacterales; Rhodobacteraceae; Roseovarius
87	HQ190509	Bacteria; Proteobacteria; Gammaproteobacteria; unclassified gammaproteobacteria; unclassified gammaproteobacteria; Methylonatrum
88	HQ616312	Bacteria; Proteobacteria; Gammaproteobacteria; Pseudomonadales; Pseudomonadaceae; Pseudomonas
89	HQ857609	Bacteria; Proteobacteria; Gammaproteobacteria; Oceanospirillales; Oceanospirillaceae; Pseudospirillum
90	JF811035	Bacteria; Bacteroidetes; Flavobacteria; Flavobacteriales; Flavobacteriaceae; Psychroflexus
91	JN003088	Bacteria; Actinobacteria; Nitriliruptoria; Nitriliruptorales; Nitriliruptoraceae; Nitriliruptor
92	JN637818	Bacteria; Proteobacteria; Alphaproteobacteria; Rhodobacterales; Rhodobacteraceae; Roseovarius
93	JN680639	Bacteria; Tenericutes; Mollicutes; unclassified Mollicutes; unclassified Mollicutes; RF9
94	JQ228578	Bacteria; Proteobacteria; Gammaproteobacteria; Vibrionales; Vibrionaceae; Vibrio
95	JQ231232	Bacteria; Proteobacteria; Betaproteobacteria; Burkholderiales; Alcaligenaceae; GKS98 freshwater group
96	JQ245579	Bacteria; Spirochaetes; Spirochaetes; Spirochaetales; Spirochaetaceae; uncultured Spirochaetaceae
97	JQ245601	Bacteria; Proteobacteria; Deltaproteobacteria; Desulfuromonadales; Desulfuromonadaceae; Desulfuromusa
98	JQ245609	Bacteria; Firmicutes; Clostridia; Clostridiales; Clostridiaceae; Anoxynatronum
99	JQ246431	Bacteria; Proteobacteria; Gammaproteobacteria; Oceanospirillales; Halomonadaceae; Halomonas
100	L35540	Bacteria; Proteobacteria; Gammaproteobacteria; Methylococcales; Methylococcaceae; Methylomicrobium
101	M93356	Bacteria; Proteobacteria; Gammaproteobacteria; Oceanospirillales; Halomonadaceae; Halomonas
102	New.CleanUp.ReferenceOTU0	Bacteria; Firmicutes; Clostridia; Clostridiales; Syntrophomonadaceae; Dethiobacter
103	New.CleanUp.ReferenceOTU1	Bacteria; Firmicutes; Clostridia; Clostridiales; Ruminococcaceae; unclassified Ruminococcaceae
104	New.CleanUp.ReferenceOTU10	Bacteria; Firmicutes; Clostridia; Clostridiales; Peptostreptococcaceae; uncultured Peptostreptococcaceae
105	New.CleanUp.ReferenceOTU11	Bacteria; Firmicutes; unclassified Firmicutes; unclassified Firmicutes; unclassified Firmicutes; unclassified Firmicutes
106	New.CleanUp.ReferenceOTU110	Bacteria; Firmicutes; Clostridia; Clostridiales; unclassified Clostridiales; unclassified Clostridiales
107	New.CleanUp.ReferenceOTU113	Bacteria; Verrucomicrobia; Opitutae; Puniceicoccales; Puniceicoccaceae; unclassified Puniceicoccaceae
108	New.CleanUp.ReferenceOTU12	Bacteria; Firmicutes; Clostridia; Clostridiales; unclassified Clostridiales; OPB54
109	New.CleanUp.ReferenceOTU13	Bacteria; Actinobacteria; Actinobacteria; Micrococcales; Microbacteriaceae; DS001
110	New.CleanUp.ReferenceOTU14	Bacteria; Proteobacteria; Alphaproteobacteria; Rickettsiales; unclassified Rickettsiales; Candidatus Odyssella
111	New.CleanUp.ReferenceOTU15	Bacteria; Proteobacteria; Gammaproteobacteria; Legionellales; Legionellaceae; uncultured Legionellaceae
112	New.CleanUp.ReferenceOTU16	Bacteria; Verrucomicrobia; Opitutae; Opitutales; Opitutaceae; unclassified Opitutaceae
113	New.CleanUp.ReferenceOTU17	Bacteria; Proteobacteria; Deltaproteobacteria; Desulfobacterales; Desulfobacteraceae; Desulfobotulus
114	New.CleanUp.ReferenceOTU18	Bacteria; Proteobacteria; Alphaproteobacteria; Rhodobacterales; Rhodobacteraceae; uncultured Rhodobacteraceae
115	New.CleanUp.ReferenceOTU19	Bacteria; unclassified bacteria; unclassified bacteria; unclassified bacteria; unclassified bacteria; unclassified bacteria
116	New.CleanUp.ReferenceOTU20	Bacteria; Spirochaetes; Spirochaetes; Spirochaetales; Spirochaetaceae; Spirochaeta
117	New.CleanUp.ReferenceOTU21	Archaea; Euryarchaeota; Halobacteria; Halobacteriales; unclassified Halobacteriales; Deep Sea Hydrothermal Vent Gp 6(DHVEG-6)
118	New.CleanUp.ReferenceOTU22	Bacteria; Firmicutes; Clostridia; Clostridiales; Caldicoprobacteraceae; Caldicoprobacter
119	New.CleanUp.ReferenceOTU24	Bacteria; Proteobacteria; Gammaproteobacteria; Legionellales; Coxiellaceae; Aquicella
120	New.CleanUp.ReferenceOTU25	Bacteria; Proteobacteria; Gammaproteobacteria; Legionellales; Legionellaceae; Legionella
121	New.CleanUp.ReferenceOTU26	Bacteria; Proteobacteria; Deltaproteobacteria; Bdellovibrionales; Bacteriovoracaceae; Bacteriovorax
122	New.CleanUp.ReferenceOTU27	Bacteria; Firmicutes; unclassified Firmicutes; unclassified Firmicutes; unclassified Firmicutes; unclassified Firmicutes
123	New.CleanUp.ReferenceOTU28	Bacteria; Bacteroidetes; Flavobacteria; Flavobacteriales; Cryomorphaceae; Owenweeksia
124	New.CleanUp.ReferenceOTU29	Bacteria; Proteobacteria; Alphaproteobacteria; Rickettsiales; Rickettsiaceae; Rickettsia
125	New.CleanUp.ReferenceOTU3	Bacteria; Bacteroidetes; unclassified Bacteroidetes; unclassified Bacteroidetes; unclassified Bacteroidetes; BD2-2
126	New.CleanUp.ReferenceOTU31	Bacteria; Firmicutes; Clostridia; Clostridiales; Peptococcaceae; Desulfitispora
127	New.CleanUp.ReferenceOTU4	Bacteria; Proteobacteria; Deltaproteobacteria; Desulfuromonadales; unclassified Desulfuromonadales; GR-WP33-58
128	New.CleanUp.ReferenceOTU42	Bacteria; Proteobacteria; Gammaproteobacteria; Oceanospirillales; Halomonadaceae; Halomonas
129	New.CleanUp.ReferenceOTU44	Bacteria; Spirochaetes; Spirochaetes; Spirochaetales; Spirochaetaceae; Spirochaeta
130	New.CleanUp.ReferenceOTU45	Bacteria; unclassified bacteria; unclassified bacteria; unclassified bacteria; unclassified bacteria; unclassified bacteria
131	New.CleanUp.ReferenceOTU48	Bacteria; TM6; unclassified TM6; unclassified TM6; unclassified TM6; unclassified TM6
132	New.CleanUp.ReferenceOTU49	Bacteria; unclassified bacteria; unclassified bacteria; unclassified bacteria; unclassified bacteria; unclassified bacteria
133	New.CleanUp.ReferenceOTU5	Bacteria; Bacteroidetes; Sphingobacteriia; Sphingobacteriales; Saprospiraceae; uncultured Saprospiraceae
134	New.CleanUp.ReferenceOTU53	Bacteria; Lentisphaerae; Lentisphaeria; unclassified Lentisphaeria; unclassified Lentisphaeria; MSBL3
135	New.CleanUp.ReferenceOTU54	Bacteria; Bacteroidetes; Sphingobacteriia; Sphingobacteriales; unclassified Sphingobacteriales; B01R012
136	New.CleanUp.ReferenceOTU6	Bacteria; Proteobacteria; Deltaproteobacteria; unclassified deltaproteobacteria; unclassified deltaproteobacteria; unclassified deltaproteobacteria
137	New.CleanUp.ReferenceOTU62	Bacteria; Spirochaetes; Spirochaetes; Spirochaetales; Spirochaetaceae; Spirochaeta
138	New.CleanUp.ReferenceOTU65	Bacteria; Bacteroidetes; Bacteroidia; Bacteroidales; unclassified Bacteroidales; ML635J-40 aquatic group
139	New.CleanUp.ReferenceOTU66	Bacteria; Bacteroidetes; Sphingobacteriia; Sphingobacteriales; unclassified Sphingobacteriales; unclassified Sphingobacteriales
140	New.CleanUp.ReferenceOTU7	Bacteria; Verrucomicrobia; Opitutae; Puniceicoccales; Puniceicoccaceae; Puniceicoccus
141	New.CleanUp.ReferenceOTU70	Bacteria; Lentisphaerae; Lentisphaeria; unclassified Lentisphaeria; unclassified Lentisphaeria; LD1-PA34
142	New.CleanUp.ReferenceOTU72	Bacteria; Firmicutes; Clostridia; Clostridiales; Ruminococcaceae; uncultured Ruminococcaceae
143	New.CleanUp.ReferenceOTU74	Bacteria; BD1-5; unclassified BD1-5; unclassified BD1-5; unclassified BD1-5; unclassified BD1-5
144	New.CleanUp.ReferenceOTU8	Bacteria; Proteobacteria; Alphaproteobacteria; Unclassified alphaproteobacterium; Unclassified alphaproteobacterium; Unclassified alphaproteobacterium
145	New.CleanUp.ReferenceOTU87	Bacteria; Spirochaetes; Spirochaetes; Spirochaetales; Spirochaetaceae; Spirochaeta
146	New.CleanUp.ReferenceOTU88	Bacteria; Cyanobacteria; unclassified Cyanobacteria; unclassified Cyanobacteria; unclassified Cyanobacteria; ML635J-21
147	New.CleanUp.ReferenceOTU9	Bacteria; Proteobacteria; Betaproteobacteria; Burkholderiales; Alcaligenaceae; GKS98 freshwater group
148	New.CleanUp.ReferenceOTU94	Bacteria; BHI80-139; unclassified BHI80-139; unclassified BHI80-139; unclassified BHI80-139; unclassified BHI80-139
149	New.CleanUp.ReferenceOTU95	Bacteria; Firmicutes; Clostridia; Clostridiales; Christensenellaceae; Christensenella
150	New.ReferenceOTU0	Bacteria; Firmicutes; Clostridia; Clostridiales; Ruminococcaceae; unclassified Ruminococcacaeae
151	New.ReferenceOTU1	Bacteria; unclassified bacteria; unclassified bacteria; unclassified bacteria; unclassified bacteria; unclassified bacteria
152	New.ReferenceOTU10	Bacteria; Bacteroidetes; Flavobacteria; Flavobacteriales; Flavobacteriaceae; Psychroflexus
153	New.ReferenceOTU11	Bacteria; Firmicutes; Clostridia; Clostridiales; Syntrophomonadaceae; Dethiobacter
154	New.ReferenceOTU12	Bacteria; Proteobacteria; Gammaproteobacteria; Oceanospirillales; Halomonadaceae; unclassified Halomonadaceae
155	New.ReferenceOTU13	Bacteria; Firmicutes; Bacilli; Bacillales; Paenibacillaceae; uncultured Paenibacillaceae
156	New.ReferenceOTU14	Bacteria; Proteobacteria; Gammaproteobacteria; Legionellales; Legionellaceae; uncultured Legionellaceae
157	New.ReferenceOTU15	Bacteria; Proteobacteria; Gammaproteobacteria; Legionellales; Legionellaceae; Legionella
158	New.ReferenceOTU16	Bacteria; Tenericutes; Mollicutes; unclassified Mollicutes; unclassified Mollicutes; RF9
159	New.ReferenceOTU17	Bacteria; Spirochaetes; Spirochaetes; Spirochaetales; Spirochaetaceae; Spirochaeta
160	New.ReferenceOTU18	Bacteria; Bacteroidetes; Flavobacteria; Flavobacteriales; Flavobacteriaceae; Psychroflexus
161	New.ReferenceOTU19	Bacteria; Firmicutes; Clostridia; Halanaerobiales; Halanaerobiaceae; Halocella
162	New.ReferenceOTU2	Bacteria; Actinobacteria; Nitriliruptoria; Nitriliruptorales; Nitriliruptoraceae; Nitriliruptor
163	New.ReferenceOTU20	Bacteria; Bacteroidetes; Cytophagia; unclassified Cytophagia; Order III Incertae Sedis; ML310M-34
164	New.ReferenceOTU21	Bacteria; Bacteroidetes; Sphingobacteriia; Sphingobacteriales; unclassified Sphingobacteriales; E6aC02
165	New.ReferenceOTU22	Bacteria; Proteobacteria; Gammaproteobacteria; Legionellales; Coxiellaceae; Coxiella
166	New.ReferenceOTU23	Bacteria; Firmicutes; Clostridia; Clostridiales; unclassified Clostridiales; OPB54
167	New.ReferenceOTU24	Bacteria; Firmicutes; Clostridia; Clostridiales; unclassified Clostridiales; OPB54
168	New.ReferenceOTU25	Bacteria; Lentisphaerae; Lentisphaeria; Victivallales; Victivallaceae; uncultured Victivallaceae
169	New.ReferenceOTU26	Bacteria; Proteobacteria; Gammaproteobacteria; Chromatiales; Ectothiorhodospiraceae; Spiribacter
170	New.ReferenceOTU27	Bacteria; Proteobacteria; Gammaproteobacteria; Oceanospirillales; Oceanospirillaceae; Pseudospirillum
171	New.ReferenceOTU28	Bacteria; Firmicutes; Clostridia; Clostridiales; Ruminococcaceae; uncultured Ruminococcaceae
172	New.ReferenceOTU29	Bacteria; Proteobacteria; Deltaproteobacteria; Desulfobacterales; Desulfobacteraceae; uncultured Desulfobacteraceae
173	New.ReferenceOTU3	Bacteria; Bacteroidetes; Cytophagia; unclassified Cytophagia; Order III Incertae Sedis; ML602J-37
174	New.ReferenceOTU30	Bacteria; Proteobacteria; Gammaproteobacteria; unclassified gammaproteobacteria; unclassified gammaproteobacteria; unclassified gammaproteobacteria
175	New.ReferenceOTU31	Bacteria; Firmicutes; Clostridia; Clostridiales; Ruminococcaceae; unclassified Ruminococcaceae
176	New.ReferenceOTU32	Bacteria; Proteobacteria; Gammaproteobacteria; Thiotrichales; Piscirickettsiaceae; Thiomicrospira
177	New.ReferenceOTU33	Bacteria; Bacteroidetes; Cytophagia; Cytophagales; Cyclobacteriaceae; uncultured Cyclobacteriaceae
178	New.ReferenceOTU34	Bacteria; Firmicutes; Bacilli; Bacillales; Bacillaceae; Bacillus
179	New.ReferenceOTU35	Bacteria; Firmicutes; Clostridia; Halanaerobiales; Halanaerobiaceae; Halocella
180	New.ReferenceOTU36	Bacteria; Firmicutes; Clostridia; Clostridiales; unclassified Clostridiales; OPB54
181	New.ReferenceOTU38	Unclassified; unclassified root; unclassified root; unclassified root; unclassified root; unclassified root
182	New.ReferenceOTU39	Bacteria; Verrucomicrobia; Opitutae; Opitutales; Opitutaceae; unclassified Opitutaceae
183	New.ReferenceOTU4	Bacteria; Verrucomicrobia; Opitutae; unclassified opitutae; unclassified opitutae; unclassified opitutae
184	New.ReferenceOTU40	Bacteria; Bacteroidetes; Sphingobacteriia; Sphingobacteriales; unclassified Sphingobacteriales; WCHB1-69
185	New.ReferenceOTU41	Bacteria; Proteobacteria; Gammaproteobacteria; unclassified gammaproteobacteria; unclassified gammaproteobacteria; unclassified gammaproteobacteria
186	New.ReferenceOTU42	Bacteria; Proteobacteria; Gammaproteobacteria; Alteromonadales; Alteromonadaceae; C1-B045
187	New.ReferenceOTU43	Bacteria; Bacteroidetes; Cytophagia; unclassified Cytophagia; Order III Incertae Sedis; A815
188	New.ReferenceOTU44	Bacteria; unclassified bacteria; unclassified bacteria; unclassified bacteria; unclassified bacteria; unclassified bacteria
189	New.ReferenceOTU45	Bacteria; Bacteroidetes; Cytophagia; unclassified Cytophagia; Order III Incertae Sedis; ML602J-37
190	New.ReferenceOTU46	Bacteria; Firmicutes; Clostridia; Clostridiales; unclassified Clostridiales; unclassified Clostridiales
191	New.ReferenceOTU47	Bacteria; Proteobacteria; Gammaproteobacteria; unclassified gammaproteobacteria; unclassified gammaproteobacteria; NKB5
192	New.ReferenceOTU48	Bacteria; Firmicutes; Clostridia; Clostridiales; unclassified Clostridiales; OPB54
193	New.ReferenceOTU49	Bacteria; Lentisphaerae; Lentisphaeria; Victivallales; Victivallaceae; uncultured Victivallaceae
194	New.ReferenceOTU5	Bacteria; Firmicutes; Clostridia; Clostridiales; Syntrophomonadaceae; uncultured Syntrophomonadaceae
195	New.ReferenceOTU50	Bacteria; Proteobacteria; Alphaproteobacteria; Rhodospirillales; Rhodospirillaceae; uncultured Rhodospirillaceae
196	New.ReferenceOTU51	Bacteria; Lentisphaerae; Lentisphaeria; unclassified Lentisphaeria; unclassified Lentisphaeria; LD1-PB3
197	New.ReferenceOTU52	Bacteria; Gemmatimonadetes; Gemmatimonadetes; unclassified Gemmatimonadetes; unclassified Gemmatimonadetes; BD2-11 terrestrial group
198	New.ReferenceOTU53	Bacteria; Bacteroidetes; Bacteroidia; Bacteroidales; unclassified Bacteroidales; ML635J-40 aquatic group
199	New.ReferenceOTU54	Bacteria; unclassified bacteria; unclassified Firmicutes; unclassified Firmicutes; unclassified Firmicutes; unclassified Firmicutes
200	New.ReferenceOTU55	Bacteria; Firmicutes; Clostridia; Clostridiales; unclassified Clostridiales; MAT-CR-H4-C10
201	New.ReferenceOTU56	Bacteria; Bacteroidetes; Cytophagia; unclassified Cytophagia; Order III Incertae Sedis; ML310M-34
202	New.ReferenceOTU57	Bacteria; Tenericutes; Mollicutes; unclassified Mollicutes; unclassified Mollicutes; NB1-n
203	New.ReferenceOTU58	Bacteria; Firmicutes; Clostridia; Clostridiales; unclassified Clostridiales; OPB54
204	New.ReferenceOTU59	Bacteria; Firmicutes; Clostridia; Halanaerobiales; Halobacteroidaceae; Orenia
205	New.ReferenceOTU6	Bacteria; Proteobacteria; Gammaproteobacteria; Oceanospirillales; unclassified Oceanospillales; OM182 clade
206	New.ReferenceOTU60	Bacteria; Planctomycetes; Phycisphaerae; unclassified phycisphaerae; unclassified phycisphaerae; MSBL9
207	New.ReferenceOTU61	Bacteria; Proteobacteria; Deltaproteobacteria; Syntrophobacterales; Syntrophaceae; uncultured Syntrophaceae
208	New.ReferenceOTU63	Bacteria; Bacteroidetes; Bacteroidia; Bacteroidales; Marinilabiaceae; uncultured Marinilabiaceae
209	New.ReferenceOTU64	Bacteria; Proteobacteria; Gammaproteobacteria; unclassified gammaproteobacteria; unclassified gammaproteobacteria; NKB5
210	New.ReferenceOTU66	Bacteria; Tenericutes; Mollicutes; unclassified Mollicutes; unclassified Mollicutes; RF9
211	New.ReferenceOTU67	Bacteria; Bacteroidetes; Bacteroidia; Bacteroidales; Rikenellaceae; Blvii28 wastewater-sludge group
212	New.ReferenceOTU68	Bacteria; Lentisphaerae; Lentisphaeria; unclassified Lentisphaeria; unclassified Lentisphaeria; SS1-B-03-39
213	New.ReferenceOTU69	Bacteria; Spirochaetes; Spirochaetes; Spirochaetales; unclassified Spirochaetales; PL-11B10
214	New.ReferenceOTU7	Bacteria; Bacteroidetes; Bacteroidia; Bacteroidales; unclassified Bacteroidales; ML635J-40 aquatic group
215	New.ReferenceOTU70	Bacteria; Proteobacteria; Alphaproteobacteria; Unclassified alphaproteobacterium; Unclassified alphaproteobacterium; LWSR 14
216	New.ReferenceOTU71	Bacteria; Proteobacteria; Deltaproteobacteria; Desulfuromonadales; unclassified Desulfuromonadales; GR-WP33-58
217	New.ReferenceOTU72	Bacteria; Firmicutes; Clostridia; Clostridiales; Clostridiaceae; Anoxynatronum
218	New.ReferenceOTU73	Bacteria; Bacteroidetes; Bacteroidia; Bacteroidales; unclassified Bacteroidales; unclassified Bacteroidales
219	New.ReferenceOTU74	Bacteria; Bacteroidetes; Bacteroidia; Bacteroidales; unclassified Bacteroidales; ML635J-40 aquatic group
220	New.ReferenceOTU75	Bacteria; Verrucomicrobia; Opitutae; Puniceicoccales; Puniceicoccaceae; unclassified Puniceicoccaceae
221	New.ReferenceOTU76	Bacteria; Firmicutes; Clostridia; Clostridiales; Peptococcaceae; Desulfitibacter
222	New.ReferenceOTU77	Bacteria; Verrucomicrobia; Opitutae; Puniceicoccales; Puniceicoccaceae; uncultured Puniceicoccaceae
223	New.ReferenceOTU78	Bacteria; Bacteroidetes; Cytophagia; unclassified Cytophagia; Order III Incertae Sedis; ML310M-34
224	New.ReferenceOTU79	Bacteria; Proteobacteria; Gammaproteobacteria; Thiotrichales; Piscirickettsiaceae; Thiomicrospira
225	New.ReferenceOTU8	Bacteria; Bacteroidetes; Flavobacteria; Flavobacteriales; Cryomorphaceae; Owenweeksia
226	New.ReferenceOTU80	Bacteria; Bacteroidetes; Sphingobacteriia; Sphingobacteriales; Chitinophagaceae; uncultured Chitinophagaceae
227	New.ReferenceOTU81	Bacteria; unclassified bacteria; unclassified bacteria; unclassified bacteria; unclassified bacteria; unclassified bacteria
228	New.ReferenceOTU82	Bacteria; Bacteroidetes; Cytophagia; unclassified Cytophagia; Order III Incertae Sedis; ML310M-34
229	New.ReferenceOTU83	Bacteria; Spirochaetes; Spirochaetes; Spirochaetales; Spirochaetaceae; Spirochaeta
230	New.ReferenceOTU84	Bacteria; unclassified bacteria; unclassified Firmicutes; unclassified Firmicutes; unclassified Firmicutes; unclassified Firmicutes
231	New.ReferenceOTU86	Bacteria; Proteobacteria; Gammaproteobacteria; Alteromonadales; Alteromonadaceae; uncultured Alteromonadaceae
232	New.ReferenceOTU87	Bacteria; unclassified bacteria; unclassified bacteria; unclassified bacteria; unclassified bacteria; unclassified bacteria
233	New.ReferenceOTU88	Bacteria; Verrucomicrobia; Opitutae; Puniceicoccales; Puniceicoccaceae; unclassified Puniceicoccaceae
234	New.ReferenceOTU89	Bacteria; Spirochaetes; Spirochaetes; Spirochaetales; unclassified Spirochaetales; PL-11B10
235	New.ReferenceOTU9	Bacteria; Firmicutes; Clostridia; Clostridiales; unclassified Clostridiales; OPB54
236	New.ReferenceOTU90	Bacteria; SBYG-2791; unclassified SBYG-2791; unclassified SBYG-2791; unclassified SBYG-2791; unclassified SBYG-2791
237	New.ReferenceOTU92	Bacteria; Firmicutes; Erysipelotrichi; Erysipelotrichales; Erysipelotrichaceae; Asteroleplasma
238	New.ReferenceOTU93	Bacteria; Bacteroidetes; Cytophagia; unclassified Cytophagia; Order III Incertae Sedis; ML602J-37
239	New.ReferenceOTU94	Bacteria; Lentisphaerae; Lentisphaeria; Victivallales; Victivallaceae; uncultured Victivallaceae
240	New.ReferenceOTU96	Bacteria; Bacteroidetes; Cytophagia; unclassified Cytophagia; Order III Incertae Sedis; ML602J-37
241	New.ReferenceOTU98	Bacteria; Cyanobacteria; unclassified Cyanobacteria; unclassified Cyanobacteria; unclassified Cyanobacteria; ML635J-21
242	X74705	Bacteria; Proteobacteria; Gammaproteobacteria; Vibrionales; Vibrionaceae; Vibrio
243	Y14594	Bacteria; Proteobacteria; Deltaproteobacteria; Desulfovibrionales; Desulfonatronaceae; Desulfonatronum
